# Supplementary material
Source: HighWire-hosted journal article supplement (https://cmaj.ca/highwire/filestream/58706/field_highwire_adjunct_files/1/statins-manns-2-at.pdf)
Supplement: statins-manns-2-at.pdf [file statins-manns-2-at.pdf]

## Appendix 2 (as supplied by the authors): Meta-regression results for all-cause mortality

| Explanatory variable(s)                                           |                     |         | Summary of effect                      |                                                      |              |
|-------------------------------------------------------------------|---------------------|---------|----------------------------------------|------------------------------------------------------|--------------|
|                                                                   | Median (range)      | n (%)   | No. of studies/<br>No. of participants | RRR (95% CI)                                         | P-value      |
| <b>Univariable meta-regression</b>                                |                     |         |                                        |                                                      |              |
| Duration of study (y)                                             | 3 (0.9,5.3)         | -       | 19/78321                               | 1.02 (0.95,1.09) per 1 y                             | 0.66         |
| Year of study                                                     | 2003 (1991,2010)    | -       | 19/78321                               | 0.99 (0.97,1.02) per 1 y                             | 0.54         |
| Dose (mg/day)                                                     | 40 (10,80)          | -       | 19/78321                               | 1.07 (0.99,1.15) per 10 mg/day                       | 0.10         |
| Baseline cholesterol (mmol/L)                                     |                     |         |                                        |                                                      |              |
| Total                                                             | 5.95 (4.80,7.27)    | -       | 19/78321                               | 1.00 (0.93,1.08) per -0.5 mmol/L                     | 0.90         |
| LDL                                                               | 4.03 (2.79,5.17)    | -       | 19/78321                               | 1.00 (0.92,1.08) per -0.5 mmol/L                     | 0.91         |
| HDL                                                               | 1.27 (0.95,1.64)    | -       | 19/78321                               | 0.79 (0.54,1.16) per 0.5 mmol/L                      | 0.21         |
| Triglycerides                                                     | 1.70 (1.33,3.60)    | -       | 19/78321                               | 0.99 (0.79,1.24) per -0.5 mmol/L                     | 0.91         |
| % $\Delta$ in LDL (statin arm)*                                   | -28 (-50,-19)       | -       | 18/78198                               | 0.97 (0.89,1.07) per -10%                            | 0.52         |
| Absolute $\Delta$ in LDL (statin arm)                             | -1.22 (-1.96,-0.75) | -       | 18/78198                               | 0.94 (0.77,1.16) per -0.5 mmol/L                     | 0.56         |
| Timepoint of LDL measure (y)                                      | 0.7 (0.08, 3)       | -       | 16/71095                               | 1.05 (0.99, 1.11) per 0.5 y                          | 0.12         |
| High potency (rosuva or atorva) compared with low potency statins | -                   | 6 (32)  | 19/78321                               | 0.90 (0.77, 1.07)                                    | 0.22         |
| Baseline cardiovascular risk (control arm)**                      | 2.4 (0, 12)         | -       | 13/51335                               | 1.02 (0.99, 1.05) per 1%                             | 0.21         |
| Mean age (y)                                                      | 58 (51,76)          | -       | 19/78321                               | 1.06 (0.96,1.16) per 5 y                             | 0.22         |
| Percent male                                                      | 62 (25,100)         | -       | 19/78321                               | 0.98 (0.94,1.02) per 10%                             | 0.28         |
| Percent diabetes                                                  | 4 (0,35)            | -       | 15/68361                               | 1.05 (1.00,1.11) per 10%                             | 0.07         |
| Percent hypertension                                              | 41 (16,100)         | -       | 12/57937                               | 1.02 (0.98,1.06) per 10%                             | 0.28         |
| <b>Multivariable meta-regression</b>                              |                     |         |                                        |                                                      |              |
| High potency, and % $\Delta$ in LDL (statin arm)                  | -28 (-50,-19)       | 6 (32)  | 18/78198                               | 0.87 (0.53,1.43)<br>1.04 (0.82,1.31) per -10%        | 0.57<br>0.74 |
| High potency, and absolute $\Delta$ in LDL (statin arm)           | -1.22 (-1.96,-0.75) | 6 (32)  | 18/78198                               | 0.91 (0.67,1.24)<br>1.04 (0.75,1.43) per -0.5 mmol/L | 0.54<br>0.82 |
| <b>Univariable meta-regression (Quality items)</b>                |                     |         |                                        |                                                      |              |
| Unclear allocation concealment (not adequate)                     | -                   | 13 (68) | 19/78321                               | 0.93 (0.79,1.10)                                     | 0.38         |
| Not double-blind                                                  | -                   | 4 (21)  | 19/78321                               | 1.10 (0.94,1.28)                                     | 0.22         |
| Inadequate description of withdrawals                             | -                   | 4 (21)  | 19/78321                               | 0.85 (0.70,1.02)                                     | 0.08         |
| Not intention-to-treat                                            | -                   | 2 (11)  | 19/78321                               | 0.92 (0.66,1.29)                                     | 0.62         |
| Private funding only                                              | -                   | 10 (53) | 19/78321                               | 0.90 (0.77,1.04)                                     | 0.15         |

$\Delta$  = change; LDL = low-density lipoprotein; HDL = high-density lipoprotein; High intensity = rosuvastatin or atorvastatin; mmol/L = millimoles per litre; mg = milligrams; Rosuva = rosuvastatin; Atorva = atorvastatin; RRR = relative risk ratio

\*first available timepoint at which LDL reduction from baseline is assessed

\*\*defined as rate of cardiovascular death or non-fatal myocardial infarction
